# Supplementary material for: Development of a flow process for an easy and fast access to 2-pyrone derivatives
Source: Royal Society of Chemistry journal article supplement (doi:10.1039/d2re00312k), 2022-10-13
Supplement: d2re00312k1.pdf [file d2re00312k1.pdf]

## Development of a flow process for an easy and fast access to 2-pyrone derivatives

Grazia Isa C. Righetti, Francesca Tentori, M. Elisabetta Brenna, Cristian Gambarotti

Department of Chemistry, Materials and Chemical Engineering “Giulio Natta”, Politecnico di Milano, piazza Leonardo da Vinci 32, I-20133 Milano, Italy.

### Electronic Supplementary Information

#### Continuous flow reaction's details

The continuous flow reactions were performed using an E-Series Integrated Flow Chemistry system from Vapourtec (Alfatech s.p.a., Genoa, Italy) equipped with a 10 mL PFA coiled tubular reactor (1.0 mm i.d. × 12.75 m length). The coil reactor was kept under controlled pressure using back pressure regulators (BPR) from IDEX Health & Science L.L.C. (Microcolumn s.r.l., Desio, Italy).

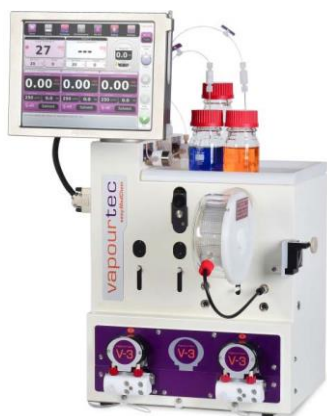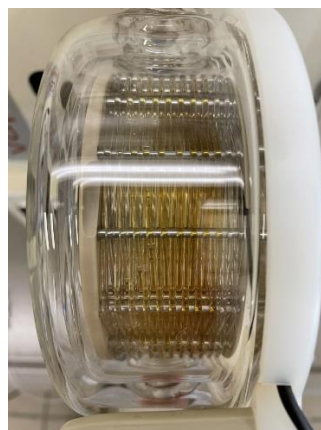

The reactor used in the research

#### Spectra of isolated compounds

The  $^1\text{H}$ -NMR was recorded on a Bruker AV 400 MHz instrument, equipped with a 5 mm multinuclear probe, and 32 scans were acquired with an acquiring time of 3 seconds for each spectrum. The chemical shifts are referred to the signal of the solvent residual peak ( $^1\text{H}$ :  $\text{CDCl}_3 = 7.26$  ppm,  $\text{DMSO-d}_6 = 2.5$  ppm,  $\text{D}_2\text{O} = 4.79$  ppm;  $^{13}\text{C}$ :  $\text{CDCl}_3 = 77.36$  ppm,  $\text{DMSO-d}_6 = 40.45$  ppm; *J. Org. Chem.* **1997**, *62*, 7512-7515)

**List of figures:**

- **Figure S1:**  $^1\text{H-NMR}$  (400 MHz, DMSO- $d_6$ ) of pyrone **2** sodium salt
- **Figure S2:**  $^{13}\text{C-NMR}$  (100.6 MHz, DMSO- $d_6$ ) of pyrone **2** sodium salt
- **Figure S3:**  $^1\text{H-NMR}$  (400 MHz,  $\text{CDCl}_3$ ) of 3-hydroxy-2-pyrone (**3**)
- **Figure S4:**  $^{13}\text{C-NMR}$  (100.6 MHz,  $\text{CDCl}_3$ ) of 3-hydroxy-2-pyrone (**3**)
- **Figure S5:**  $^1\text{H-NMR}$  (400 MHz,  $\text{D}_2\text{O}$ ) of 3-hydroxy-2-pyrone (**3**)

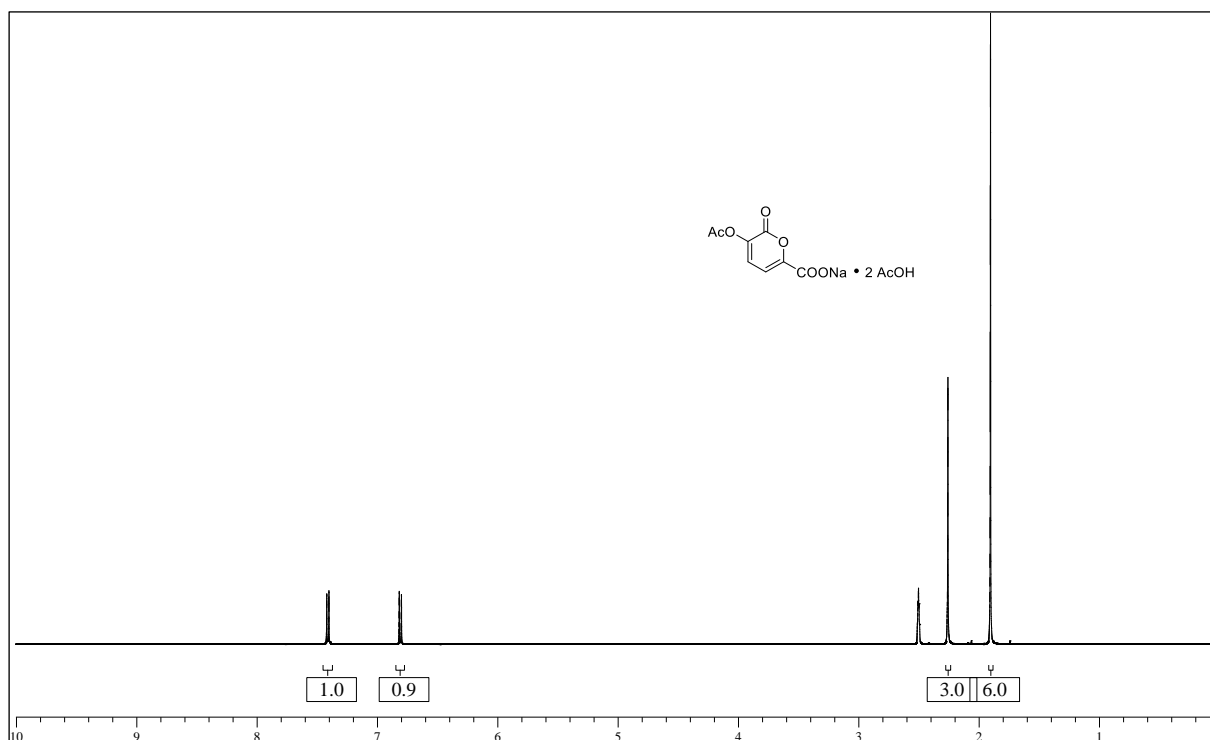

**Figure S1:**  $^1\text{H-NMR}$  (400 MHz, DMSO- $d_6$ ) of pyrone **2** sodium salt

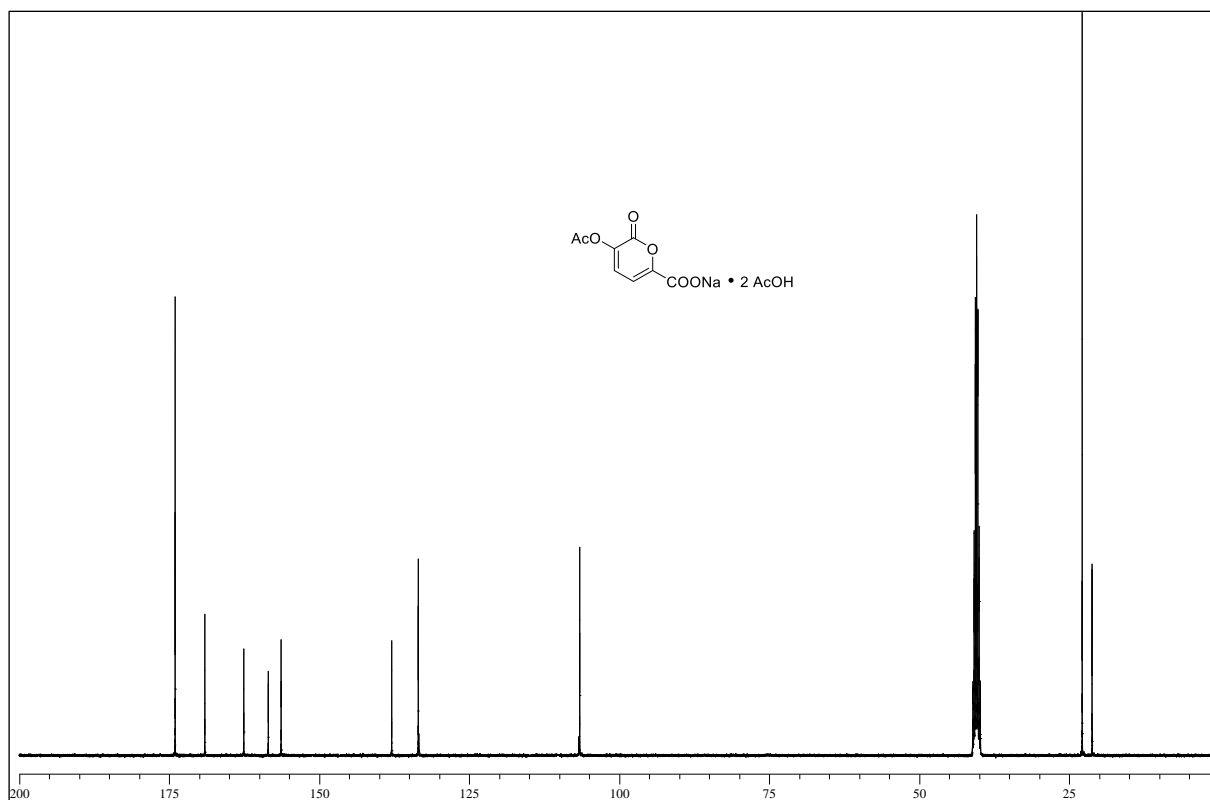

**Figure S2:** <sup>13</sup>C-NMR (100.6 MHz, DMSO-d<sub>6</sub>) of pyrone **2** sodium salt

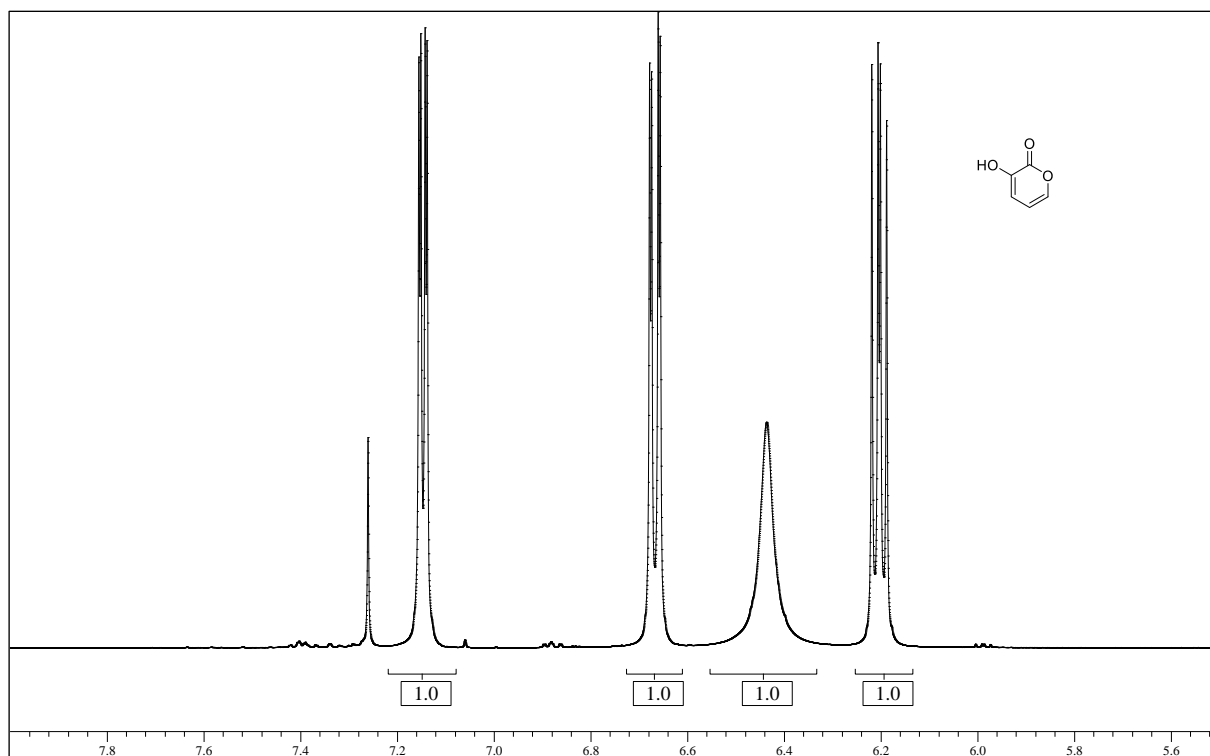

**Figure S3:** <sup>1</sup>H-NMR (400 MHz, CDCl<sub>3</sub>) of 3-hydroxy-2-pyrone (**3**)

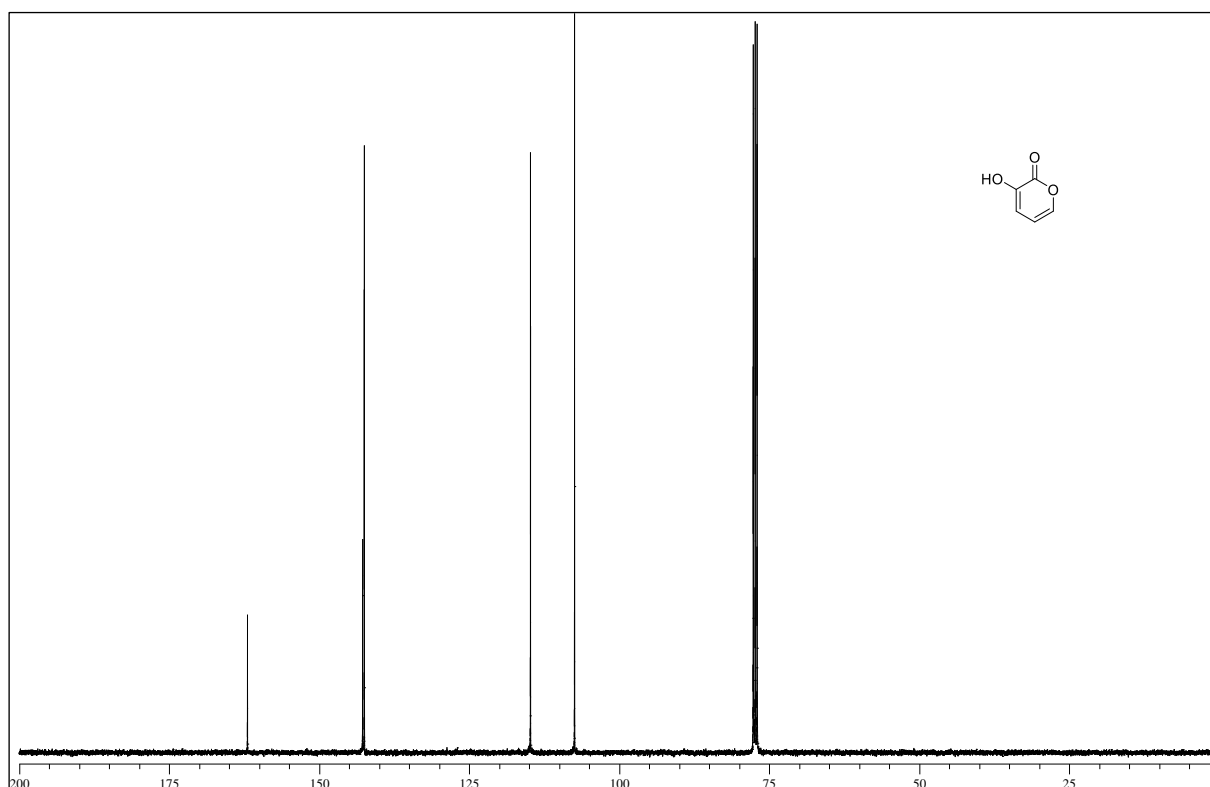

**Figure S4:**  $^{13}\text{C}$ -NMR (100.6 MHz,  $\text{CDCl}_3$ ) of 3-hydroxy-2-pyrone (**3**)

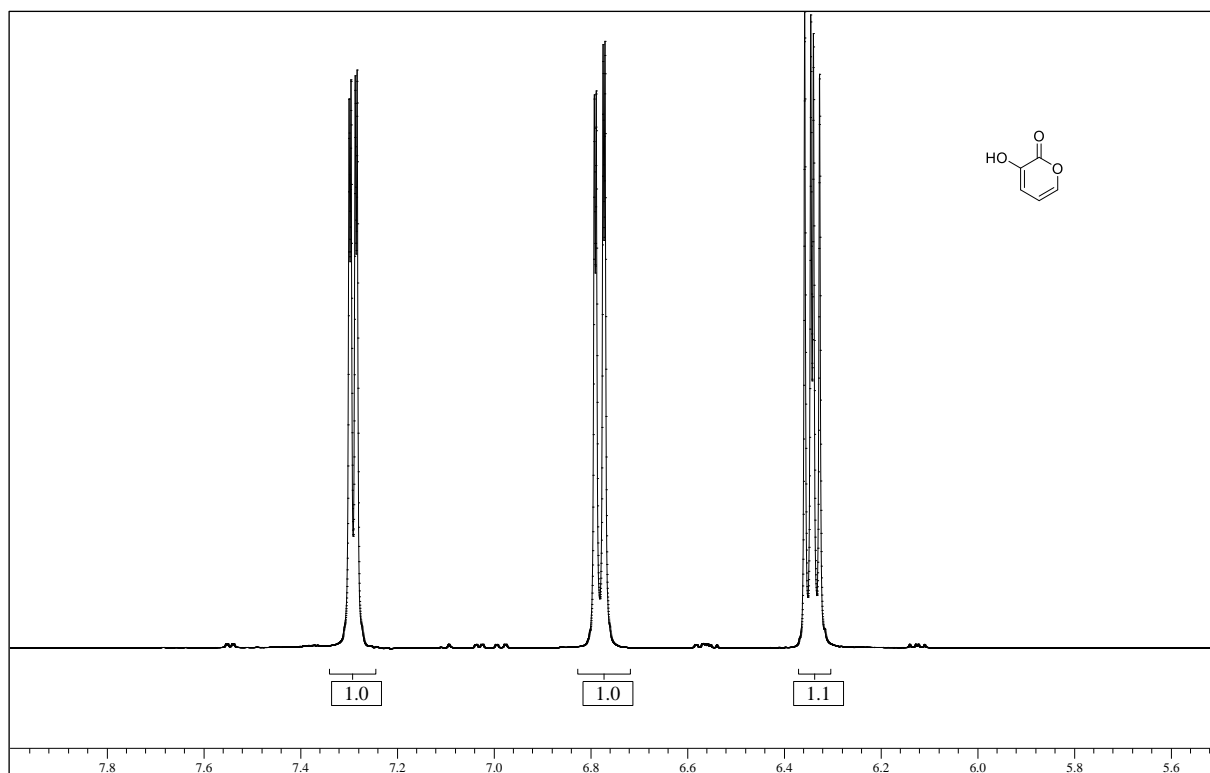

**Figure S5:**  $^1\text{H}$ -NMR (400 MHz,  $\text{D}_2\text{O}$ ) of 3-hydroxy-2-pyrone (**3**)
